# Supplementary material for: Low compressibility of photoelectric properties of layered molecular non-metal halide AsI3
Source: Royal Society of Chemistry journal article supplement (doi:10.1039/d4ta08640f), 2025-01-01
Supplement: d4ta08640f1.pdf [file d4ta08640f1.pdf]

## Supplementary Information

### Low Compressibility of Photoelectric Properties in the Layered Molecular Non-Metal Halide AsI<sub>3</sub>

*Zonglun Li<sup>a,b,c</sup>, Dexiang Gao<sup>a,b</sup>, Shuxin Chen<sup>c</sup>, Lei Yue<sup>c</sup>, Bao Yuan<sup>a,b</sup>, Xudong Shen<sup>a,b</sup>,  
Le Kang<sup>a,b,\*</sup>, Quanjun Li<sup>c,\*</sup>, Bingbing Liu<sup>c</sup>*

<sup>a</sup>Institute of High Energy Physics, Chinese Academy of Sciences, Beijing 100049, China

<sup>b</sup>Spallation Neutron Source Science Center, Dongguan 523803, China.

<sup>c</sup>State Key Laboratory of High Pressure and Superhard Materials, Jilin University, Changchun 130012, China.

\*Correspondence and requests for materials should be addressed to L.K. (email: kangl@ihep.ac.cn), or to Q.J.L. (email: liquanjun@jlu.edu.cn)

**Key words:** AsI<sub>3</sub>, photoelectric properties, high pressure, molecular crystal, compressibility

**S1:** Crystal structure of  $\text{AsI}_3$  at ambient conditions.

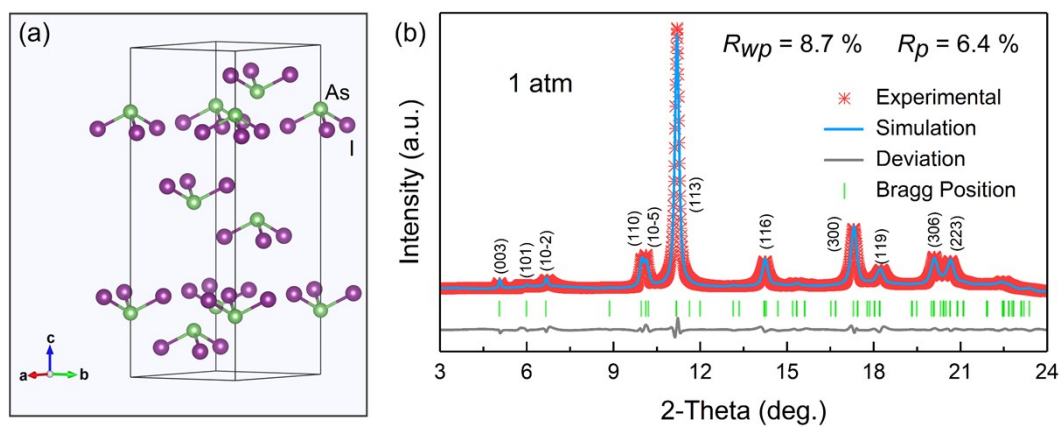

**Fig. S1.** (a) Crystal structure of  $R\bar{3}$  phase  $\text{AsI}_3$  at ambient conditions. (b) Rietveld refinements result of  $R\bar{3}$  phase  $\text{AsI}_3$  at ambient conditions.

**S2:** Evolution in synchrotron XRD patterns of  $\text{AsI}_3$  under high pressure.

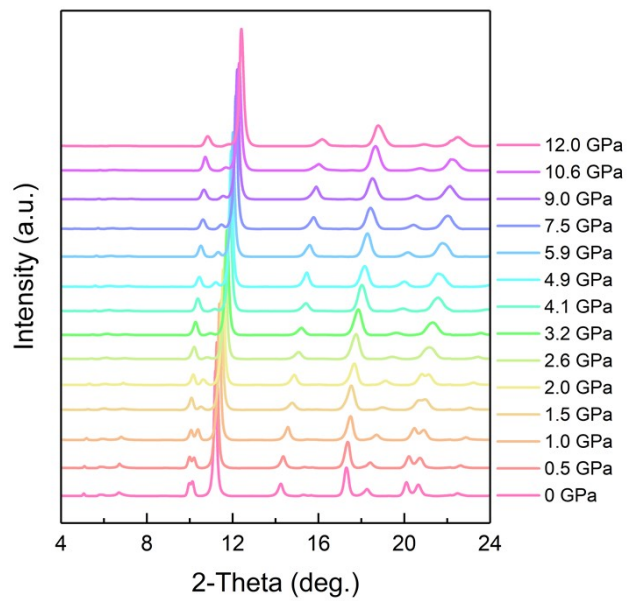

**Fig. S2.** Synchrotron X-ray diffraction (XRD) patterns of  $\text{AsI}_3$  powders at selected pressures.

### S3: Compressibility of AsI<sub>3</sub>.

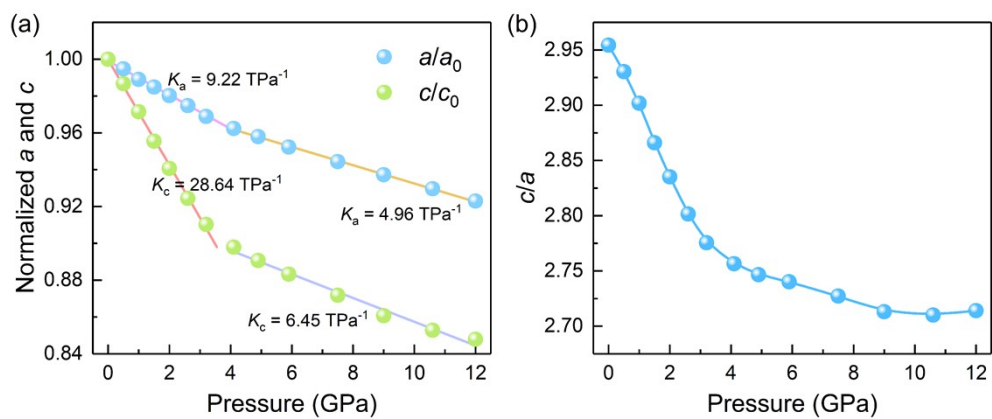

**Fig. S3.** (a) Evolution of the normalized cell parameters  $a/a_0$  and  $c/c_0$  of AsI<sub>3</sub> as a function of pressure. (b) Evolution of the ratio of  $c/a$  of AsI<sub>3</sub> as a function of pressure.

**S4:** Rietveld refinement results of  $\text{AsI}_3$  at various pressures.

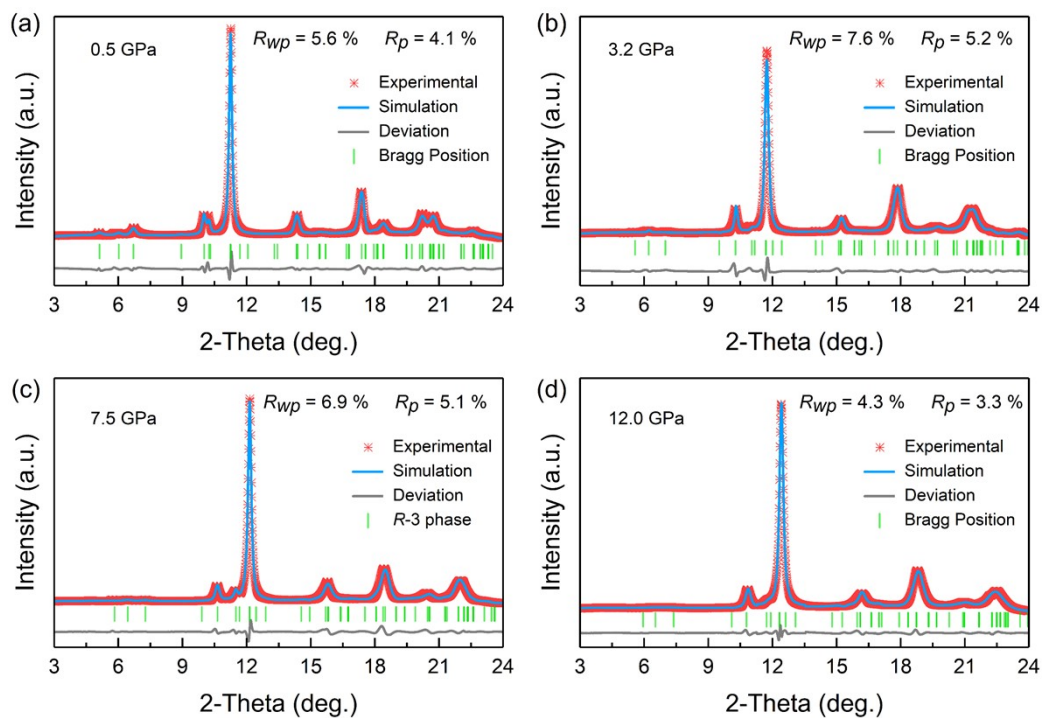

**Fig. S4.** Rietveld refinements results of  $\text{AsI}_3$  under various pressures. (a) 0.5 GPa. (b) 3.2 GPa. (c) 7.5 GPa. (d) 12.0 GPa.

## S5: Lattice dynamics of AsI<sub>3</sub> at ambient conditions.

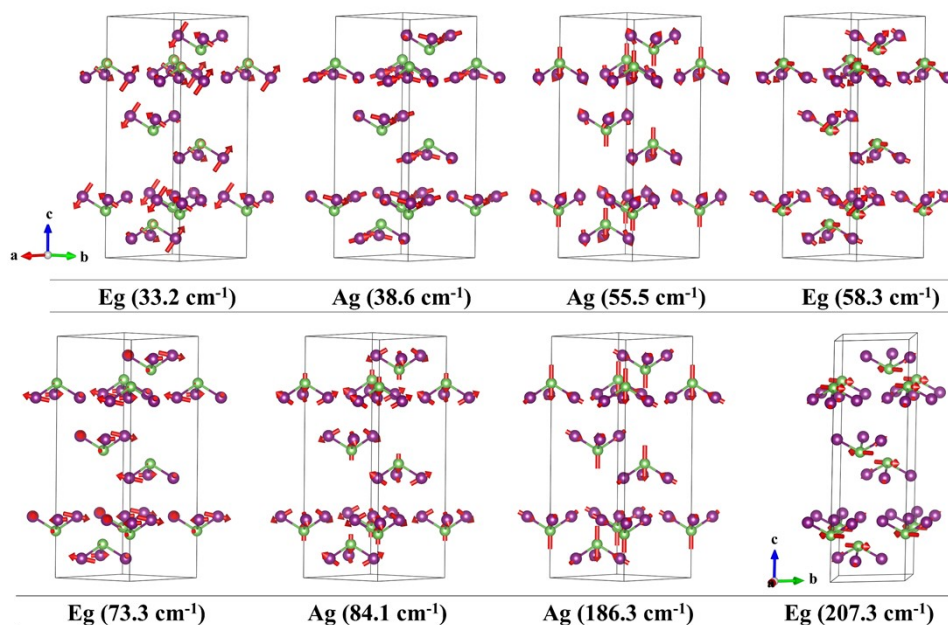

**Fig. S5.** Calculated vibrational patterns for the most prominent Raman modes of AsI<sub>3</sub> at ambient conditions. The vibration frequencies are shown at the bottom of each pattern. Raman vibration modes were calculated using density functional perturbation theory (DFPT)<sup>1, 2</sup> as implemented in the Phonopy package<sup>3, 4</sup> and visualized using the VESTA package.<sup>5</sup> Furthermore, the  $E_g$  mode at 58.3 cm<sup>-1</sup> is difficult to observe at ambient temperatures and can be detected at low temperatures.<sup>6</sup> We also failed to recognize this mode, so vibrational patterns of Eg at 58.3cm<sup>-1</sup> can be used as a reference here.

## S6: The crystal orbital Hamilton population (COHP) analysis.

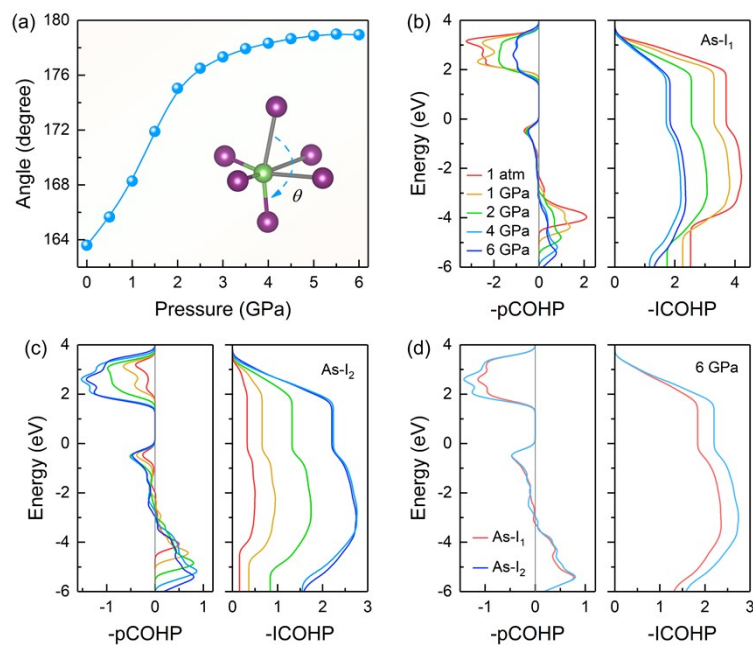

**Fig. S6.** (a) The calculated I-As-I angle of  $\text{AsI}_3$  as a function of pressure. (b-c) The negative crystal orbital Hamilton population (-COHP) and the negative integrated COHP (-ICOHP) of As-I<sub>1</sub> and As-I<sub>2</sub> bonds in  $\text{AsI}_3$  at selected pressures. (d) The -COHP and -ICOHP of As-I<sub>1</sub> and As-I<sub>2</sub> bonds at 6 GPa. The crystal orbital Hamilton population (COHP) was calculated by using the plane wave methods as implemented in the LOBSTER package.<sup>7, 8</sup>

**S7.** Photocurrent response at selected external bias.

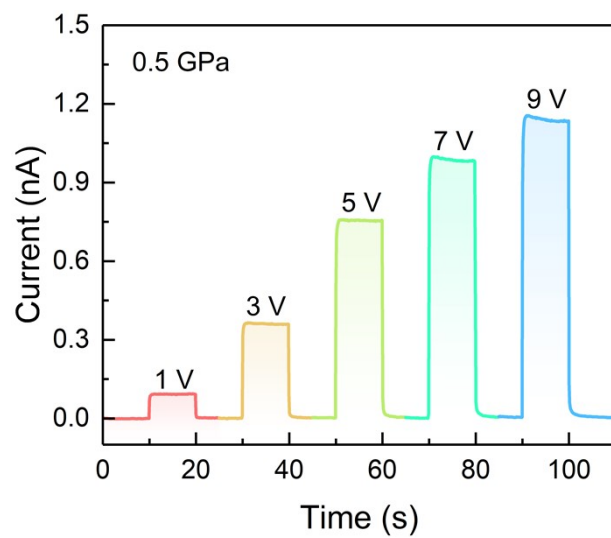

**Fig. S7.** The photocurrent curves of  $\text{AsI}_3$  under 520 nm laser illumination at external bias from 1 to 9 V.



**S8.** Photocurrent with 520 nm laser illumination under high pressure.

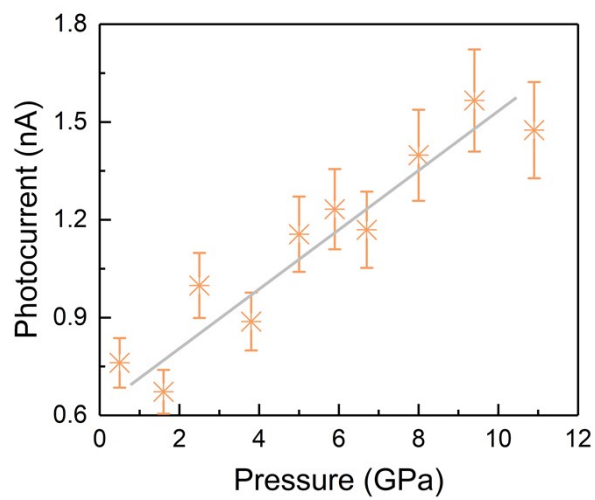

**Fig. S8.** Changes in the photocurrent of the  $\text{AsI}_3$  device when illuminated with a 520 nm laser at various pressures.

## S9. 2D band structure of $\text{AsI}_3$ at selected pressures.

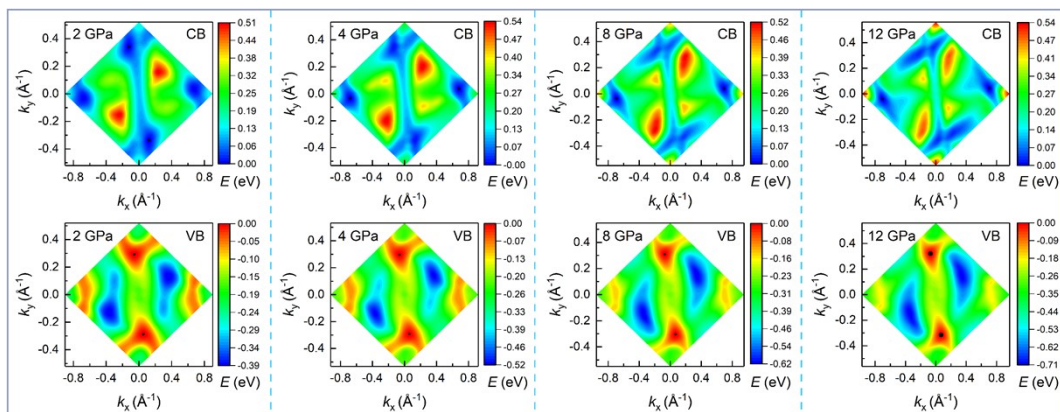

**Fig. S9.** 2D projections of the valence bands (VB) and conduction bands (CB) of  $\text{AsI}_3$  in the first Brillouin zone at selected pressures. The black circle indicates the VBM or the CBM.

**S10.** Partial density of states for various layered iodides.

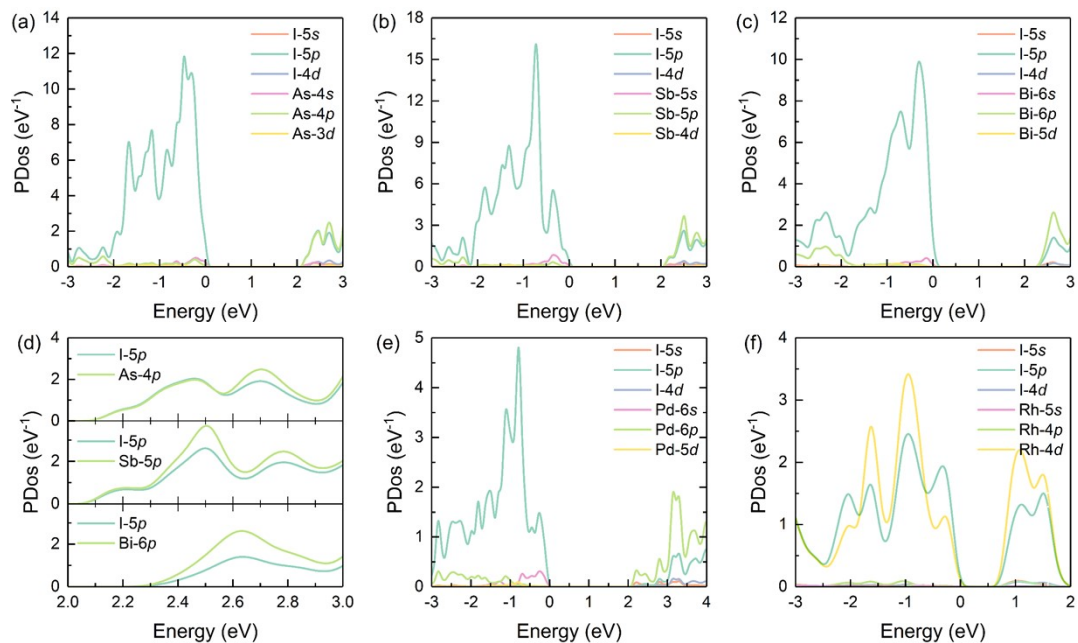

**Fig. S10.** Partial density of states for various layered iodides at ambient pressure. (a)  $\text{AsI}_3$ , (b)  $\text{SbI}_3$ , (c)  $\text{BiI}_3$ , (d) Zoomed-in partial density of states for the conduction bands of  $\text{AsI}_3$ ,  $\text{SbI}_3$ , and  $\text{BiI}_3$ . (e)  $\text{PbI}_2$ , and (f)  $\text{RhI}_3$ .

**S11.** Partial density of states for various non-layered metal iodides.

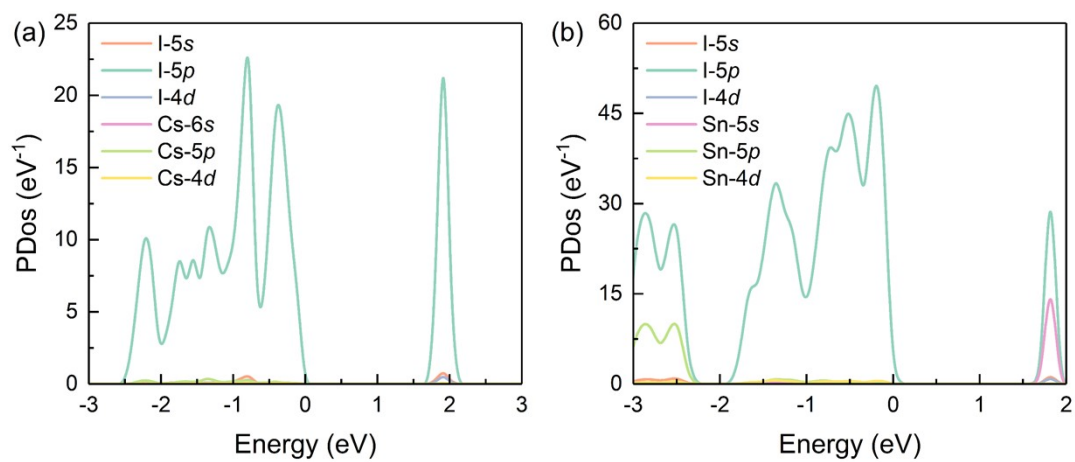

**Fig. S11.** Partial density of states for various non-layered metal iodides at ambient pressure, (a)  $\text{CsI}_3$ , (b)  $\text{SnI}_4$ .

## S12. Partial charge density and photocurrent in non-layered metal iodides.

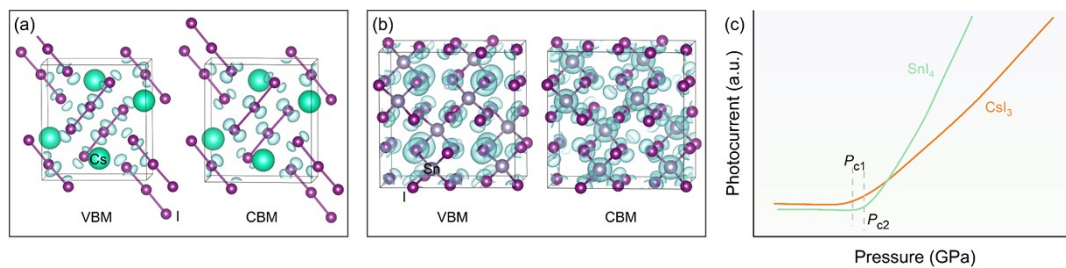

**Fig. S12.** Charge distribution of the VBM and CBM of non-layered metal iodides at ambient pressure, (a) CsI<sub>3</sub>,<sup>9</sup> (b) SnI<sub>4</sub>.<sup>10</sup> (c) Schematic diagram illustrating variations in the photocurrent response of CsI<sub>3</sub> and SnI<sub>4</sub> under high pressure.

**S13.** Phonon dispersion curve of  $\text{AsI}_3$  at ambient pressure.

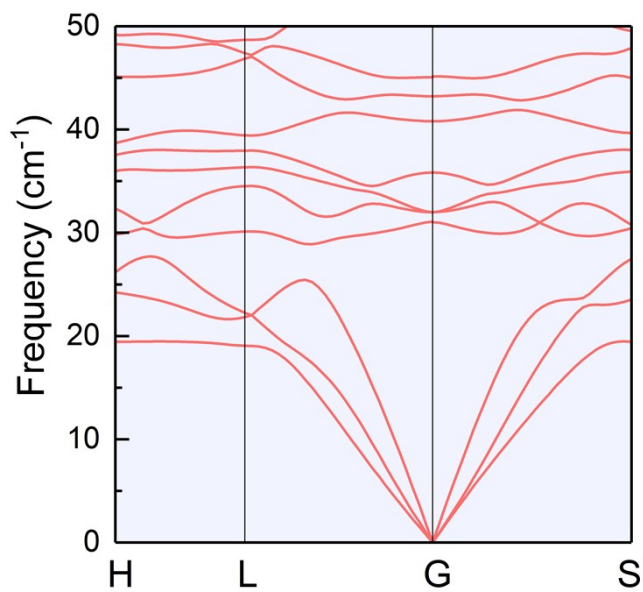

**Fig. S13.** (a) Phonon dispersion curve of  $\text{AsI}_3$  at ambient pressure. The phonon spectra were obtained by employing the CASTEP package<sup>11, 12</sup>, which demonstrates the rationality and reliability of the structural optimization.

## References

1. P. Giannozzi, S. de Gironcoli, P. Pavone and S. Baroni, *Phys. Rev. B*, 1991, **43**, 7231-7242.
2. X. Gonze and C. Lee, *Phys. Rev. B*, 1997, **55**, 10355-10368.
3. A. Togo, L. Chaput, T. Tadano and I. Tanaka, *J. Phys.: Condens. Matter*, 2023, **35**, 353001.
4. A. Togo, *J. Phys. Soc. Jpn.*, 2022, **92**, 012001.
5. K. Momma and F. Izumi, *J. Appl. Cryst.*, 2011, **44**, 1272-1276.
6. H. C. Hsueh, R. K. Chen, H. Vass, S. J. Clark, G. J. Ackland, W. C. K. Poon and J. Crain, *Phys. Rev. B*, 1998, **58**, 14812-14822.
7. R. Dronskowski and P. E. Bloechl, *J. Phys. Chem.*, 1993, **97**, 8617-8624.
8. A. Decker, G. A. Landrum and R. Dronskowski, *Z. anorg. allg. Chem.*, 2002, **628**, 295-302.
9. Z. Li, Q. Li, H. Li, L. Yue, D. Zhao, F. Tian, Q. Dong, X. Zhang, X. Jin, L. Zhang, R. Liu and B. Liu, *Adv. Funct. Mater.*, 2022, **32**, 2108636.
10. R. Lu, Z. Li, L. Yue, L. Song, S. Fang, T. Liu, P. Shen, Q. Li, X. Jin and B. Liu, *Mater. Today Phys.*, 2024, **42**, 101381.
11. S. J. Clark, M. D. Segall, C. J. Pickard, P. J. Hasnip, M. I. J. Probert, K. Refson and M. C. Payne, *Z. Krist.*, 2005, **220**, 567-570.
12. K. Refson, P. R. Tulip and S. J. Clark, *Phys. Rev. B*, 2006, **73**, 155114.
